# Supplementary material
Source: publisher site journal article supplement (https://www.dovepress.com/article/supplementary_file/581985/581985%20Revised%20Supplementary%20Table%20S1%20-%20S3.xlsx)
Supplement: Supplementary file 1 [file 581985%20Revised%20Supplementary%20Table%20S1%20-%20S3.xlsx]

## Sheet: Supplementary Table S1 
Supplementary Table S1. Differentially Expressed Genes in EA-Treated KOA Rats
logicname set num data
101 A VS B∩B VS D 80 ENSCPOG00000031139	ENSCPOG00000031817	ENSCPOG00000039426	ENSCPOG00000033522	ENSCPOG00000036496	ENSCPOG00000003248	ENSCPOG00000024606	ENSCPOG00000034755	ENSCPOG00000038663	ENSCPOG00000033631	ENSCPOG00000022081	ENSCPOG00000000506	MSTRG.22931	ENSCPOG00000032187	MSTRG.19171	ENSCPOG00000025992	ENSCPOG00000039699	ENSCPOG00000033524	ENSCPOG00000032778	MSTRG.30512	ENSCPOG00000034325	ENSCPOG00000024036	ENSCPOG00000014376	ENSCPOG00000040373	MSTRG.19830	ENSCPOG00000034580	ENSCPOG00000007251	ENSCPOG00000034452	ENSCPOG00000024349	MSTRG.24974	ENSCPOG00000023721	ENSCPOG00000008520	ENSCPOG00000037062	MSTRG.19145	ENSCPOG00000035052	ENSCPOG00000019609	ENSCPOG00000031719	MSTRG.3486	ENSCPOG00000030135	MSTRG.22898	ENSCPOG00000009446	MSTRG.3497	ENSCPOG00000011180	ENSCPOG00000004412	ENSCPOG00000005161	MSTRG.22885	MSTRG.1949	MSTRG.19739	ENSCPOG00000007933	ENSCPOG00000008023
100 A VS B 364 ENSCPOG00000031403	MSTRG.19185	ENSCPOG00000032901	ENSCPOG00000008069	ENSCPOG00000037725	ENSCPOG00000037674	ENSCPOG00000015096	ENSCPOG00000031212	ENSCPOG00000040633	MSTRG.23123	ENSCPOG00000008107	MSTRG.19142	ENSCPOG00000013993	ENSCPOG00000015577	ENSCPOG00000000481	ENSCPOG00000008852	MSTRG.19151	ENSCPOG00000002330	MSTRG.19157	ENSCPOG00000034912	MSTRG.19133	ENSCPOG00000036700	ENSCPOG00000012324	MSTRG.22923	MSTRG.22925	ENSCPOG00000039900	ENSCPOG00000033854	MSTRG.22922	ENSCPOG00000033299	ENSCPOG00000001430	MSTRG.22893	MSTRG.25647	ENSCPOG00000039549	ENSCPOG00000033829	MSTRG.22900	MSTRG.22934	ENSCPOG00000037042	ENSCPOG00000035429	ENSCPOG00000037326	ENSCPOG00000022675	ENSCPOG00000038041	ENSCPOG00000022248	ENSCPOG00000035778	ENSCPOG00000013876	ENSCPOG00000040644	ENSCPOG00000034763	MSTRG.22892	MSTRG.19170	ENSCPOG00000031592	ENSCPOG00000038947
111 A VS B∩B VS C∩B VS D 29 ENSCPOG00000015652	MSTRG.24413	ENSCPOG00000008531	MSTRG.19172	MSTRG.8623	ENSCPOG00000013450	ENSCPOG00000011233	ENSCPOG00000021338	ENSCPOG00000021819	ENSCPOG00000039445	MSTRG.22490	ENSCPOG00000001577	ENSCPOG00000014564	MSTRG.19164	MSTRG.14631	MSTRG.25655	ENSCPOG00000038797	MSTRG.22842	MSTRG.6131	ENSCPOG00000002522	ENSCPOG00000032135	MSTRG.29341	ENSCPOG00000031940	ENSCPOG00000031500	ENSCPOG00000037409	ENSCPOG00000037489	ENSCPOG00000030813	MSTRG.22868	ENSCPOG00000006135
110 A VS B∩B VS C 28 ENSCPOG00000015070	ENSCPOG00000038184	ENSCPOG00000030272	MSTRG.9890	ENSCPOG00000030002	MSTRG.22897	MSTRG.22899	ENSCPOG00000031118	ENSCPOG00000039177	MSTRG.17495	MSTRG.14598	MSTRG.4814	MSTRG.11676	MSTRG.24236	MSTRG.3476	MSTRG.23174	MSTRG.19163	MSTRG.32538	ENSCPOG00000014843	ENSCPOG00000025869	ENSCPOG00000037601	ENSCPOG00000027614	ENSCPOG00000001898	ENSCPOG00000025630	MSTRG.26576	MSTRG.25802	ENSCPOG00000039622	ENSCPOG00000001781
011 B VS C∩B VS D 37 ENSCPOG00000036243	ENSCPOG00000032792	ENSCPOG00000002427	ENSCPOG00000038140	ENSCPOG00000034851	MSTRG.31795	ENSCPOG00000037636	ENSCPOG00000023115	ENSCPOG00000000832	ENSCPOG00000007659	ENSCPOG00000012393	ENSCPOG00000003329	MSTRG.29000	ENSCPOG00000038970	MSTRG.20336	ENSCPOG00000037123	ENSCPOG00000040109	ENSCPOG00000004247	MSTRG.29290	ENSCPOG00000035147	ENSCPOG00000034737	ENSCPOG00000032751	ENSCPOG00000031600	MSTRG.22857	ENSCPOG00000008877	MSTRG.1920	ENSCPOG00000038321	ENSCPOG00000008554	MSTRG.22525	ENSCPOG00000006136	MSTRG.27435	ENSCPOG00000038753	MSTRG.3990	ENSCPOG00000003204	ENSCPOG00000004438	ENSCPOG00000020060	ENSCPOG00000037423
010 B VS C 92 MSTRG.4657	MSTRG.28024	MSTRG.25916	ENSCPOG00000004054	ENSCPOG00000014400	ENSCPOG00000039565	ENSCPOG00000033005	ENSCPOG00000026773	ENSCPOG00000038253	ENSCPOG00000011605	MSTRG.21599	ENSCPOG00000013344	MSTRG.25003	MSTRG.18478	MSTRG.3484	MSTRG.20833	MSTRG.26639	ENSCPOG00000032859	ENSCPOG00000002686	MSTRG.4975	MSTRG.2674	MSTRG.22852	MSTRG.24975	MSTRG.17142	ENSCPOG00000036613	MSTRG.24997	MSTRG.7499	MSTRG.25047	ENSCPOG00000009674	MSTRG.26470	ENSCPOG00000012054	ENSCPOG00000033144	ENSCPOG00000006836	ENSCPOG00000008985	ENSCPOG00000038271	ENSCPOG00000033010	ENSCPOG00000001291	ENSCPOG00000023450	MSTRG.10230	ENSCPOG00000008898	MSTRG.24973	ENSCPOG00000039611	ENSCPOG00000020962	MSTRG.9017	ENSCPOG00000003591	MSTRG.33127	MSTRG.29264	MSTRG.12046	ENSCPOG00000007974	ENSCPOG00000000070
001 B VS D 71 MSTRG.14022	ENSCPOG00000000422	ENSCPOG00000001646	ENSCPOG00000006067	MSTRG.29450	MSTRG.28180	MSTRG.18125	ENSCPOG00000031222	MSTRG.13510	MSTRG.31285	ENSCPOG00000032916	ENSCPOG00000014734	ENSCPOG00000036397	MSTRG.2362	ENSCPOG00000040235	MSTRG.32012	MSTRG.25652	ENSCPOG00000012235	ENSCPOG00000010415	ENSCPOG00000005871	ENSCPOG00000037812	ENSCPOG00000005103	MSTRG.27956	ENSCPOG00000026055	ENSCPOG00000011325	ENSCPOG00000011135	MSTRG.2985	MSTRG.25646	ENSCPOG00000031832	ENSCPOG00000037311	MSTRG.26142	ENSCPOG00000007649	ENSCPOG00000010931	ENSCPOG00000032460	ENSCPOG00000001979	ENSCPOG00000003163	MSTRG.29347	ENSCPOG00000012030	MSTRG.27514	ENSCPOG00000004034	ENSCPOG00000024142	MSTRG.29342	ENSCPOG00000008648	MSTRG.25598	MSTRG.25336	ENSCPOG00000031429	MSTRG.4340	ENSCPOG00000004194	ENSCPOG00000008042	MSTRG.29289
[truncated: 314 more columns]

## Sheet: Supplementary Table S2
Supplementary Table S2. KEGG Pathway Enrichment of DEGs
id	num	qvalue	per	ratio	class	ID	Descrption	Pvalue	Qvalue
Osteoclast differentiation	6	3.094944e-08	75	0.046	Organismal Systems	ko04380	Osteoclast differentiation	3.409444e-10	3.094944e-08
Relaxin signaling pathway	6	3.094944e-08	75	0.045	Organismal Systems	ko04926	Relaxin signaling pathway	3.917651e-10	3.094944e-08
Hepatitis B	6	7.926955e-08	75	0.036	Human Diseases	ko05161	Hepatitis B	1.505118e-09	7.926955e-08
Growth hormone synthesis, secretion and action	5	1.347526e-06	62.5	0.041	Organismal Systems	ko04935	Growth hormone synthesis, secretion and action	3.411459e-08	1.347526e-06
FoxO signaling pathway	5	1.925112e-06	62.5	0.036	Environmental Information Processing	ko04068	FoxO signaling pathway	6.092126e-08	1.925112e-06
Prolactin signaling pathway	4	1.070981e-05	50	0.052	Organismal Systems	ko04917	Prolactin signaling pathway	4.503261e-07	1.070981e-05
Chronic myeloid leukemia	4	1.070981e-05	50	0.051	Human Diseases	ko05220	Chronic myeloid leukemia	4.744854e-07	1.070981e-05
MAPK signaling pathway - fly	4	1.457273e-05	50	0.046	Environmental Information Processing	ko04013	MAPK signaling pathway - fly	7.378597e-07	1.457273e-05
Human cytomegalovirus infection	5	1.500832e-05	62.5	0.021	Human Diseases	ko05163	Human cytomegalovirus infection	8.549042e-07	1.500832e-05
Colorectal cancer	4	1.511145e-05	50	0.043	Human Diseases	ko05210	Colorectal cancer	9.656255e-07	1.511145e-05
GnRH signaling pathway	4	1.511145e-05	50	0.042	Organismal Systems	ko04912	GnRH signaling pathway	1.052063e-06	1.511145e-05
Endocrine resistance	4	1.595035e-05	50	0.04	Human Diseases	ko01522	Endocrine resistance	1.346162e-06	1.595035e-05
Prostate cancer	4	1.595035e-05	50	0.039	Human Diseases	ko05215	Prostate cancer	1.400568e-06	1.595035e-05
Dorso-ventral axis formation	3	1.595035e-05	37.5	0.115	Organismal Systems	ko04320	Dorso-ventral axis formation	1.47401e-06	1.595035e-05
AGE-RAGE signaling pathway in diabetic complications	4	1.595035e-05	50	0.038	Human Diseases	ko04933	AGE-RAGE signaling pathway in diabetic complications	1.514274e-06	1.595035e-05
Chagas disease	4	1.828158e-05	50	0.036	Human Diseases	ko05142	Chagas disease	1.896854e-06	1.828158e-05
T cell receptor signaling pathway	4	1.828158e-05	50	0.036	Organismal Systems	ko04660	T cell receptor signaling pathway	1.967005e-06	1.828158e-05
Th17 cell differentiation	4	1.885262e-05	50	0.035	Organismal Systems	ko04659	Th17 cell differentiation	2.189077e-06	1.885262e-05
TNF signaling pathway	4	1.885262e-05	50	0.035	Environmental Information Processing	ko04668	TNF signaling pathway	2.267087e-06	1.885262e-05
MAPK signaling pathway	5	2.430928e-05	62.5	0.017	Environmental Information Processing	ko04010	MAPK signaling pathway	3.077124e-06	2.430928e-05
Neurotrophin signaling pathway	4	2.618909e-05	50	0.031	Organismal Systems	ko04722	Neurotrophin signaling pathway	3.480828e-06	2.618909e-05
Fc epsilon RI signaling pathway	4	3.518645e-05	50	0.029	Organismal Systems	ko04664	Fc epsilon RI signaling pathway	4.978697e-06	3.518645e-05
Estrogen signaling pathway	4	3.518645e-05	50	0.028	Organismal Systems	ko04915	Estrogen signaling pathway	5.122078e-06	3.518645e-05
Signaling pathways regulating pluripotency of stem cells	4	3.874629e-05	50	0.027	Cellular Processes	ko04550	Signaling pathways regulating pluripotency of stem cells	5.885512e-06	3.874629e-05
Adrenergic signaling in cardiomyocytes	4	3.926862e-05	50	0.027	Organismal Systems	ko04261	Adrenergic signaling in cardiomyocytes	6.213389e-06	3.926862e-05
Gastric cancer	4	4.198922e-05	50	0.026	Human Diseases	ko05226	Gastric cancer	6.909619e-06	4.198922e-05
Cellular senescence	4	5.338841e-05	50	0.025	Cellular Processes	ko04218	Cellular senescence	9.123336e-06	5.338841e-05
Hepatocellular carcinoma	4	5.943119e-05	50	0.024	Human Diseases	ko05225	Hepatocellular carcinoma	1.053211e-05	5.943119e-05
Alcoholism	4	1.032407e-04	50	0.02	Human Diseases	ko05034	Alcoholism	1.894925e-05	1.032407e-04
Kaposi sarcoma-associated herpesvirus infection	4	1.041670e-04	50	0.02	Human Diseases	ko05167	Kaposi sarcoma-associated herpesvirus infection	2.012225e-05	1.041670e-04
VEGF signaling pathway	3	1.041670e-04	37.5	0.048	Environmental Information Processing	ko04370	VEGF signaling pathway	2.109711e-05	1.041670e-04
Endometrial cancer	3	1.041670e-04	37.5	0.048	Human Diseases	ko05213	Endometrial cancer	2.109711e-05	1.041670e-04
Chemical carcinogenesis - receptor activation	4	1.062694e-04	50	0.02	Human Diseases	ko05207	Chemical carcinogenesis - receptor activation	2.219551e-05	1.062694e-04
Viral carcinogenesis	4	1.156526e-04	50	0.019	Human Diseases	ko05203	Viral carcinogenesis	2.488726e-05	1.156526e-04
Proteoglycans in cancer	4	1.210326e-04	50	0.019	Human Diseases	ko05205	Proteoglycans in cancer	2.681102e-05	1.210326e-04
Acute myeloid leukemia	3	1.335357e-04	37.5	0.043	Human Diseases	ko05221	Acute myeloid leukemia	3.042585e-05	1.335357e-04
Phospholipase D signaling pathway	4	1.443105e-04	50	0.017	Environmental Information Processing	ko04072	Phospholipase D signaling pathway	3.501618e-05	1.443105e-04
Adherens junction	3	1.443105e-04	37.5	0.041	Cellular Processes	ko04520	Adherens junction	3.596596e-05	1.443105e-04
Human T-cell leukemia virus 1 infection	4	1.443105e-04	50	0.017	Human Diseases	ko05166	Human T-cell leukemia virus 1 infection	3.685696e-05	1.443105e-04
Renal cell carcinoma	3	1.443105e-04	37.5	0.04	Human Diseases	ko05211	Renal cell carcinoma	3.744767e-05	1.443105e-04
Non-small cell lung cancer	3	1.443105e-04	37.5	0.04	Human Diseases	ko05223	Non-small cell lung cancer	3.744767e-05	1.443105e-04
Chemical carcinogenesis - reactive oxygen species	4	1.482990e-04	50	0.017	Human Diseases	ko05208	Chemical carcinogenesis - reactive oxygen species	3.942125e-05	1.482990e-04
Glioma	3	1.608525e-04	37.5	0.038	Human Diseases	ko05214	Glioma	4.37763e-05	1.608525e-04
Pertussis	3	1.694501e-04	37.5	0.037	Human Diseases	ko05133	Pertussis	4.718864e-05	1.694501e-04
Pancreatic cancer	3	1.718989e-04	37.5	0.037	Human Diseases	ko05212	Pancreatic cancer	4.895856e-05	1.718989e-04
EGFR tyrosine kinase inhibitor resistance	3	1.872959e-04	37.5	0.035	Human Diseases	ko01521	EGFR tyrosine kinase inhibitor resistance	5.452919e-05	1.872959e-04
Tuberculosis	4	1.909550e-04	50	0.015	Human Diseases	ko05152	Tuberculosis	5.680308e-05	1.909550e-04
ErbB signaling pathway	3	1.991507e-04	37.5	0.034	Environmental Information Processing	ko04012	ErbB signaling pathway	6.050148e-05	1.991507e-04
Gap junction	3	2.301760e-04	37.5	0.032	Cellular Processes	ko04540	Gap junction	7.138369e-05	2.301760e-04
IL-17 signaling pathway	3	2.459937e-04	37.5	0.031	Organismal Systems	ko04657	IL-17 signaling pathway	7.849141e-05	2.459937e-04
TGF-beta signaling pathway	3	2.459937e-04	37.5	0.031	Environmental Information Processing	ko04350	TGF-beta signaling pathway	8.095994e-05	2.459937e-04
PD-L1 expression and PD-1 checkpoint pathway in cancer	3	2.459937e-04	37.5	0.031	Human Diseases	ko05235	PD-L1 expression and PD-1 checkpoint pathway in cancer	8.095994e-05	2.459937e-04
Th1 and Th2 cell differentiation	3	2.488617e-04	37.5	0.031	Organismal Systems	ko04658	Th1 and Th2 cell differentiation	8.347891e-05	2.488617e-04
Prion disease	4	2.624044e-04	50	0.014	Human Diseases	ko05020	Prion disease	9.083284e-05	2.624044e-04
Melanogenesis	3	2.624044e-04	37.5	0.03	Organismal Systems	ko04916	Melanogenesis	9.13433e-05	2.624044e-04
Circadian entrainment	3	2.732475e-04	37.5	0.029	Organismal Systems	ko04713	Circadian entrainment	9.68472e-05	2.732475e-04
Toll-like receptor signaling pathway	3	2.874074e-04	37.5	0.028	Organismal Systems	ko04620	Toll-like receptor signaling pathway	0.000105504	2.874074e-04
Choline metabolism in cancer	3	2.874074e-04	37.5	0.028	Human Diseases	ko05231	Choline metabolism in cancer	0.000105504	2.874074e-04
C-type lectin receptor signaling pathway	3	3.102454e-04	37.5	0.027	Organismal Systems	ko04625	C-type lectin receptor signaling pathway	0.000117815	3.102454e-04
Parathyroid hormone synthesis, secretion and action	3	3.102454e-04	37.5	0.027	Organismal Systems	ko04928	Parathyroid hormone synthesis, secretion and action	0.000117815	3.102454e-04
Toxoplasmosis	3	3.393915e-04	37.5	0.026	Human Diseases	ko05145	Toxoplasmosis	0.000131031	3.393915e-04
Progesterone-mediated oocyte maturation	3	3.427068e-04	37.5	0.026	Organismal Systems	ko04914	Progesterone-mediated oocyte maturation	0.00013448	3.427068e-04
Cholinergic synapse	3	3.550115e-04	37.5	0.026	Organismal Systems	ko04725	Cholinergic synapse	0.000141555	3.550115e-04
Human papillomavirus infection	4	4.187892e-04	50	0.012	Human Diseases	ko05165	Human papillomavirus infection	0.000170031	4.187892e-04
Sphingolipid signaling pathway	3	4.187892e-04	37.5	0.024	Environmental Information Processing	ko04071	Sphingolipid signaling pathway	0.000172287	4.187892e-04
Platelet activation	3	4.633295e-04	37.5	0.023	Organismal Systems	ko04611	Platelet activation	0.000193543	4.633295e-04
Apelin signaling pathway	3	5.927827e-04	37.5	0.021	Environmental Information Processing	ko04371	Apelin signaling pathway	0.00025137	5.927827e-04
Insulin signaling pathway	3	5.963113e-04	37.5	0.021	Organismal Systems	ko04910	Insulin signaling pathway	0.00025664	5.963113e-04
Oocyte meiosis	3	5.999013e-04	37.5	0.021	Cellular Processes	ko04114	Oocyte meiosis	0.000261982	5.999013e-04
Leishmaniasis	3	6.411947e-04	37.5	0.02	Human Diseases	ko05140	Leishmaniasis	0.000284074	6.411947e-04
B cell receptor signaling pathway	3	6.876270e-04	37.5	0.02	Organismal Systems	ko04662	B cell receptor signaling pathway	0.000313349	6.876270e-04
Breast cancer	3	6.876270e-04	37.5	0.02	Human Diseases	ko05224	Breast cancer	0.000313349	6.876270e-04
Retrograde endocannabinoid signaling	3	6.913688e-04	37.5	0.019	Organismal Systems	ko04723	Retrograde endocannabinoid signaling	0.00031943	6.913688e-04
Cushing syndrome	3	7.775206e-04	37.5	0.019	Human Diseases	ko04934	Cushing syndrome	0.000364155	7.775206e-04
Hepatitis C	3	7.812744e-04	37.5	0.019	Human Diseases	ko05160	Hepatitis C	0.000370858	7.812744e-04
mTOR signaling pathway	3	7.993619e-04	37.5	0.018	Environmental Information Processing	ko04150	mTOR signaling pathway	0.000384503	7.993619e-04
PI3K-Akt signaling pathway	4	9.269838e-04	50	0.009	Environmental Information Processing	ko04151	PI3K-Akt signaling pathway	0.000456589	9.269838e-04
MicroRNAs in cancer	3	9.269838e-04	37.5	0.017	Human Diseases	ko05206	MicroRNAs in cancer	0.000457625	9.269838e-04
cGMP-PKG signaling pathway	3	9.307914e-04	37.5	0.017	Environmental Information Processing	ko04022	cGMP-PKG signaling pathway	0.000465396	9.307914e-04
Thyroid cancer	2	9.781993e-04	25	0.056	Human Diseases	ko05216	Thyroid cancer	0.000495291	9.781993e-04
NOD-like receptor signaling pathway	3	1.155527e-03	37.5	0.016	Organismal Systems	ko04621	NOD-like receptor signaling pathway	0.000592391	1.155527e-03
Natural killer cell mediated cytotoxicity	3	1.195030e-03	37.5	0.016	Organismal Systems	ko04650	Natural killer cell mediated cytotoxicity	0.000620206	1.195030e-03
Bladder cancer	2	1.224259e-03	25	0.049	Human Diseases	ko05219	Bladder cancer	0.000643124	1.224259e-03
Aldosterone-regulated sodium reabsorption	2	1.269561e-03	25	0.048	Organismal Systems	ko04960	Aldosterone-regulated sodium reabsorption	0.000674957	1.269561e-03
Chemokine signaling pathway	3	1.317302e-03	37.5	0.015	Organismal Systems	ko04062	Chemokine signaling pathway	0.000708675	1.317302e-03
Focal adhesion	3	1.458409e-03	37.5	0.014	Cellular Processes	ko04510	Focal adhesion	0.000793817	1.458409e-03
Yersinia infection	3	1.583103e-03	37.5	0.014	Human Diseases	ko05135	Yersinia infection	0.000873499	1.583103e-03
Apoptosis - fly	2	1.583103e-03	25	0.042	Cellular Processes	ko04214	Apoptosis - fly	0.000881728	1.583103e-03
Lipid and atherosclerosis	3	1.635486e-03	37.5	0.014	Human Diseases	ko05417	Lipid and atherosclerosis	0.000921255	1.635486e-03
Human immunodeficiency virus 1 infection	3	1.660315e-03	37.5	0.013	Human Diseases	ko05170	Human immunodeficiency virus 1 infection	0.000945749	1.660315e-03
Type II diabetes mellitus	2	1.660969e-03	25	0.04	Human Diseases	ko04930	Type II diabetes mellitus	0.000956634	1.660969e-03
Pathways in cancer	4	1.735846e-03	50	0.007	Human Diseases	ko05200	Pathways in cancer	0.00101383	1.735846e-03
Rap1 signaling pathway	3	1.735846e-03	37.5	0.013	Environmental Information Processing	ko04015	Rap1 signaling pathway	0.00102173	1.735846e-03
cAMP signaling pathway	3	1.739284e-03	37.5	0.013	Environmental Information Processing	ko04024	cAMP signaling pathway	0.00103476	1.739284e-03
Thermogenesis	3	2.092211e-03	37.5	0.012	Organismal Systems	ko04714	Thermogenesis	0.00125797	2.092211e-03
Ras signaling pathway	3	2.220211e-03	37.5	0.012	Environmental Information Processing	ko04014	Ras signaling pathway	0.00134899	2.220211e-03
Long-term depression	2	2.315576e-03	25	0.033	Organismal Systems	ko04730	Long-term depression	0.00142159	2.315576e-03
Shigellosis	3	2.434229e-03	37.5	0.011	Human Diseases	ko05131	Shigellosis	0.00150984	2.434229e-03
Salmonella infection	3	2.517542e-03	37.5	0.011	Human Diseases	ko05132	Salmonella infection	0.00157745	2.517542e-03
GnRH secretion	2	2.626439e-03	25	0.03	Organismal Systems	ko04929	GnRH secretion	0.0016623	2.626439e-03
Neutrophil extracellular trap formation	3	2.659950e-03	37.5	0.011	Organismal Systems	ko04613	Neutrophil extracellular trap formation	0.00170035	2.659950e-03
Long-term potentiation	2	2.731980e-03	25	0.029	Organismal Systems	ko04720	Long-term potentiation	0.00176368	2.731980e-03
Pathogenic Escherichia coli infection	3	2.834916e-03	37.5	0.011	Human Diseases	ko05130	Pathogenic Escherichia coli infection	0.00184808	2.834916e-03
Platinum drug resistance	2	3.083727e-03	25	0.027	Human Diseases	ko01524	Platinum drug resistance	0.0020298	3.083727e-03
Melanoma	2	3.191721e-03	25	0.027	Human Diseases	ko05218	Melanoma	0.00214128	3.191721e-03
Central carbon metabolism in cancer	2	3.191721e-03	25	0.027	Human Diseases	ko05230	Central carbon metabolism in cancer	0.00214128	3.191721e-03
Coronavirus disease - COVID-19	3	3.686813e-03	37.5	0.01	Human Diseases	ko05171	Coronavirus disease - COVID-19	0.00249677	3.686813e-03
Serotonergic synapse	2	7.259228e-03	25	0.017	Organismal Systems	ko04726	Serotonergic synapse	0.004962	7.259228e-03
Glutamatergic synapse	2	7.438962e-03	25	0.017	Organismal Systems	ko04724	Glutamatergic synapse	0.00513194	7.438962e-03
HIF-1 signaling pathway	2	7.744718e-03	25	0.017	Environmental Information Processing	ko04066	HIF-1 signaling pathway	0.00539189	7.744718e-03
Thyroid hormone signaling pathway	2	8.836328e-03	25	0.016	Organismal Systems	ko04919	Thyroid hormone signaling pathway	0.0062078	8.836328e-03
Dopaminergic synapse	2	9.843953e-03	25	0.015	Organismal Systems	ko04728	Dopaminergic synapse	0.00697799	9.843953e-03
Vascular smooth muscle contraction	2	1.003521e-02	25	0.014	Organismal Systems	ko04270	Vascular smooth muscle contraction	0.00717708	1.003521e-02
Apoptosis	2	1.008651e-02	25	0.014	Cellular Processes	ko04210	Apoptosis	0.00727761	1.008651e-02
Autophagy - animal	2	1.187490e-02	25	0.013	Cellular Processes	ko04140	Autophagy - animal	0.00864312	1.187490e-02
Oxytocin signaling pathway	2	1.268055e-02	25	0.013	Organismal Systems	ko04921	Oxytocin signaling pathway	0.00930977	1.268055e-02
Pathways of neurodegeneration - multiple diseases	3	1.270267e-02	37.5	0.006	Human Diseases	ko05022	Pathways of neurodegeneration - multiple diseases	0.00940641	1.270267e-02
Fc gamma R-mediated phagocytosis	2	1.482951e-02	25	0.011	Organismal Systems	ko04666	Fc gamma R-mediated phagocytosis	0.0110752	1.482951e-02
Influenza A	2	1.519590e-02	25	0.011	Human Diseases	ko05164	Influenza A	0.011445	1.519590e-02
Axon guidance	2	1.708920e-02	25	0.011	Organismal Systems	ko04360	Axon guidance	0.0129791	1.708920e-02
Diabetic cardiomyopathy	2	2.264084e-02	25	0.009	Human Diseases	ko05415	Diabetic cardiomyopathy	0.0173389	2.264084e-02
Regulation of actin cytoskeleton	2	2.443012e-02	25	0.009	Cellular Processes	ko04810	Regulation of actin cytoskeleton	0.0188638	2.443012e-02
Circadian rhythm	1	3.996872e-02	12.5	0.03	Organismal Systems	ko04710	Circadian rhythm	0.0311149	3.996872e-02
Toll and Imd signaling pathway	1	4.791606e-02	12.5	0.025	Organismal Systems	ko04624	Toll and Imd signaling pathway	0.037605	4.791606e-02
Vasopressin-regulated water reabsorption	1	5.452599e-02	12.5	0.022	Organismal Systems	ko04962	Vasopressin-regulated water reabsorption	0.0431376	5.452599e-02
Cocaine addiction	1	5.754902e-02	12.5	0.02	Human Diseases	ko05030	Cocaine addiction	0.0458935	5.754902e-02
Alzheimer disease	2	6.880849e-02	25	0.005	Human Diseases	ko05010	Alzheimer disease	0.0553081	6.880849e-02
Glycerolipid metabolism	1	7.353045e-02	12.5	0.016	Metabolism	ko00561	Glycerolipid metabolism	0.059569	7.353045e-02
Cortisol synthesis and secretion	1	7.517780e-02	12.5	0.015	Organismal Systems	ko04927	Cortisol synthesis and secretion	0.0613793	7.517780e-02
Amphetamine addiction	1	7.887064e-02	12.5	0.014	Human Diseases	ko05031	Amphetamine addiction	0.0649909	7.887064e-02
RIG-I-like receptor signaling pathway	1	7.887064e-02	12.5	0.014	Organismal Systems	ko04622	RIG-I-like receptor signaling pathway	0.0658919	7.887064e-02
Epithelial cell signaling in Helicobacter pylori infection	1	7.887064e-02	12.5	0.014	Human Diseases	ko05120	Epithelial cell signaling in Helicobacter pylori infection	0.0658919	7.887064e-02
Renin secretion	1	8.041564e-02	12.5	0.014	Organismal Systems	ko04924	Renin secretion	0.0676917	8.041564e-02
Thyroid hormone synthesis	1	8.193400e-02	12.5	0.013	Organismal Systems	ko04918	Thyroid hormone synthesis	0.0694883	8.193400e-02
Antigen processing and presentation	1	8.342632e-02	12.5	0.013	Organismal Systems	ko04612	Antigen processing and presentation	0.071282	8.342632e-02
Longevity regulating pathway - worm	1	9.524203e-02	12.5	0.011	Organismal Systems	ko04212	Longevity regulating pathway - worm	0.0819805	9.524203e-02
Insulin secretion	1	9.556939e-02	12.5	0.011	Organismal Systems	ko04911	Insulin secretion	0.0828671	9.556939e-02
Longevity regulating pathway	1	9.993977e-02	12.5	0.011	Organismal Systems	ko04211	Longevity regulating pathway	0.0872892	9.993977e-02
Axon regeneration	1	1.002235e-01	12.5	0.01	Organismal Systems	ko04361	Axon regeneration	0.0881713	1.002235e-01
Aldosterone synthesis and secretion	1	1.034816e-01	12.5	0.01	Organismal Systems	ko04925	Aldosterone synthesis and secretion	0.0916925	1.034816e-01
Glycerophospholipid metabolism	1	1.037320e-01	12.5	0.01	Metabolism	ko00564	Glycerophospholipid metabolism	0.092571	1.037320e-01
Inflammatory mediator regulation of TRP channels	1	1.039781e-01	12.5	0.01	Organismal Systems	ko04750	Inflammatory mediator regulation of TRP channels	0.0934487	1.039781e-01
Glucagon signaling pathway	1	1.090524e-01	12.5	0.009	Organismal Systems	ko04922	Glucagon signaling pathway	0.0986993	1.090524e-01
Insulin resistance	1	1.140270e-01	12.5	0.009	Human Diseases	ko04931	Insulin resistance	0.103923	1.140270e-01
Leukocyte transendothelial migration	1	1.198451e-01	12.5	0.008	Organismal Systems	ko04670	Leukocyte transendothelial migration	0.109984	1.198451e-01
AMPK signaling pathway	1	1.236856e-01	12.5	0.008	Environmental Information Processing	ko04152	AMPK signaling pathway	0.114292	1.236856e-01
Fluid shear stress and atherosclerosis	1	1.384390e-01	12.5	0.007	Human Diseases	ko05418	Fluid shear stress and atherosclerosis	0.128801	1.384390e-01
Alcoholic liver disease	1	1.402138e-01	12.5	0.007	Human Diseases	ko04936	Alcoholic liver disease	0.131339	1.402138e-01
Hippo signaling pathway	1	1.508591e-01	12.5	0.006	Environmental Information Processing	ko04390	Hippo signaling pathway	0.142266	1.508591e-01
JAK-STAT signaling pathway	1	1.593026e-01	12.5	0.006	Environmental Information Processing	ko04630	JAK-STAT signaling pathway	0.152245	1.593026e-01
Non-alcoholic fatty liver disease	1	1.593026e-01	12.5	0.006	Human Diseases	ko04932	Non-alcoholic fatty liver disease	0.152245	1.593026e-01
Endocytosis	1	2.343344e-01	12.5	0.004	Cellular Processes	ko04144	Endocytosis	0.225436	2.343344e-01
Epstein-Barr virus infection	1	2.461256e-01	12.5	0.004	Human Diseases	ko05169	Epstein-Barr virus infection	0.238337	2.461256e-01
Cytokine-cytokine receptor interaction	1	2.621282e-01	12.5	0.003	Environmental Information Processing	ko04060	Cytokine-cytokine receptor interaction	0.255492	2.621282e-01
Huntington disease	1	2.761015e-01	12.5	0.003	Human Diseases	ko05016	Huntington disease	0.270859	2.761015e-01
Neuroactive ligand-receptor interaction	1	3.032016e-01	12.5	0.003	Environmental Information Processing	ko04080	Neuroactive ligand-receptor interaction	0.299364	3.032016e-01
Amyotrophic lateral sclerosis	1	3.159340e-01	12.5	0.003	Human Diseases	ko05014	Amyotrophic lateral sclerosis	0.313934	3.159340e-01
Metabolic pathways	1	8.149133e-01	12.5	0.001	Metabolism	ko01100	Metabolic pathways	0.814913	8.149133e-01

## Sheet: Supplementary Table S3
Supplementary Table S3. Knee Joint Histopathology Scoring Criteria
Parameter	Score 0 (None)	Score 1 (Mild)	Score 2 (Moderate)	Score 3 (Severe)
Inflammatory infiltration	Essentially no inflammatory cell infiltration; only occasional scattered cells; no clustering	Scattered or focal infiltration with a small number of inflammatory cells; affected area <10 % of ROI	Distinct infiltration with a multifocal/patchy distribution; affected area 10–30 % of ROI, with locally increased cell density	Dense inflammatory cell infiltration with extensive/diffuse distribution; affected area >30 % of ROI
Edema	Compact stromal architecture; no obvious interstitial widening or exudation	Mild stromal loosening or slight interstitial widening, localized; affected area <10 % of ROI	Clear interstitial widening and tissue separation, with possible exudation; affected area 10–30 % of ROI	Marked, extensive edema (prominent tissue separation, substantial interstitial widening and/or obvious exudation); affected area >30 % of ROI
Structural damage	Preserved tissue architecture with clear boundaries; no apparent damage	Mild architectural disturbance and/or focal injury; tissue continuity largely maintained	Obvious structural damage with wider architectural distortion, fissures/clefts, focal necrosis, and/or erosive changes	Extensive structural destruction (loss of continuity, large areas of necrosis and/or severe erosion); tissue architecture poorly preserved
Total score calculation: The total score (0–9) is the sum of the scores for inflammatory cell infiltration, edema, and structural damage.
